# Supplementary material for: Evidence of Human Parvovirus B19 Infection in the Post-Mortem Brain Tissue of the Elderly
Source: MDPI journal article supplement (doi:10.3390/v10110582), 2018-10-25
Supplement: s1 [file s1]

Supplementary materials

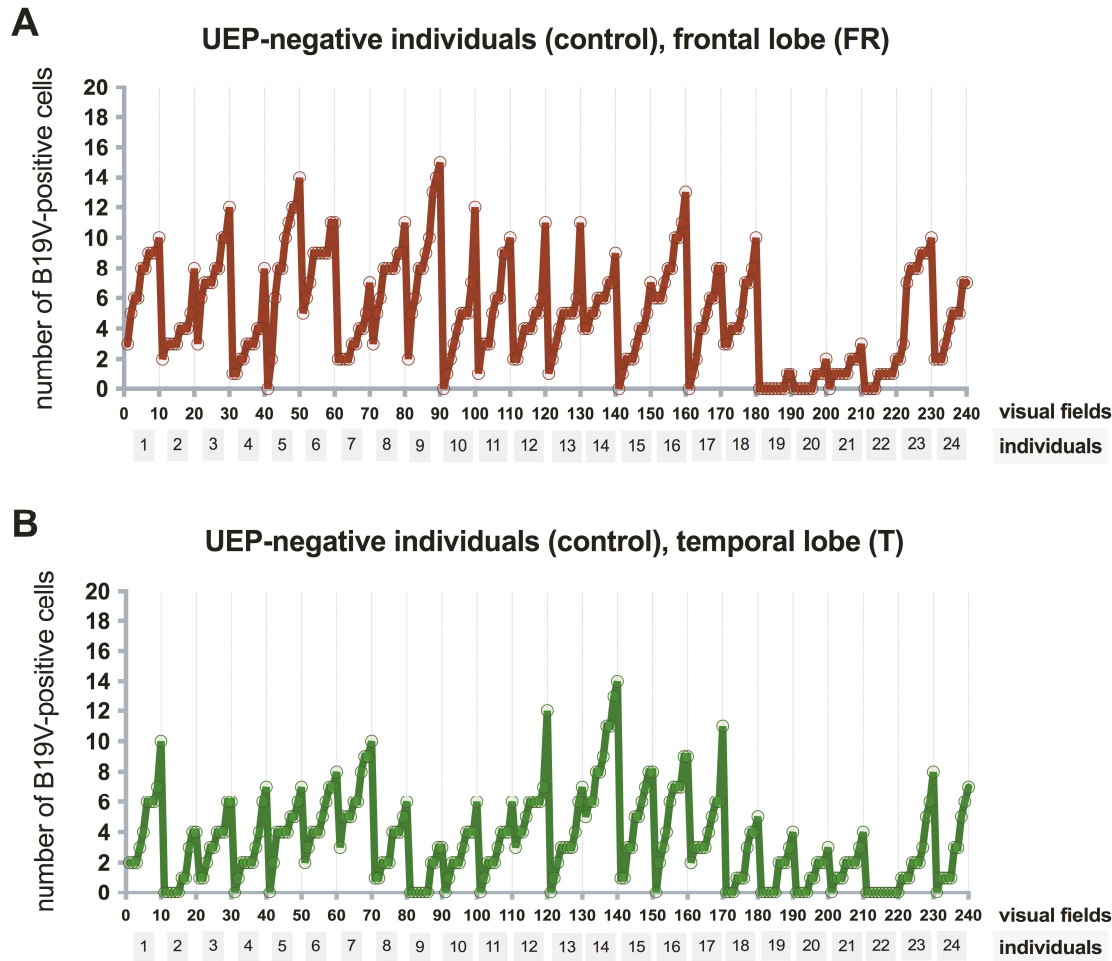

Supplementary Figure 1. An overview of the B19V-positive cell numbers per visual field: (A) Representation of the B19V-positive cell numbers per visual field in the UEP-negative control group in the frontal lobe, (B) Representation of the B19V-positive cell numbers per visual field in the UEP-negative control group in the temporal lobe.
