# Supplementary material for: Evidence of Human Parvovirus B19 Infection in the Post-Mortem Brain Tissue of the Elderly
Source: MDPI journal article supplement (doi:10.3390/v10110582), 2018-10-25
Supplement: s1 [file s1]

## Supplementary materials

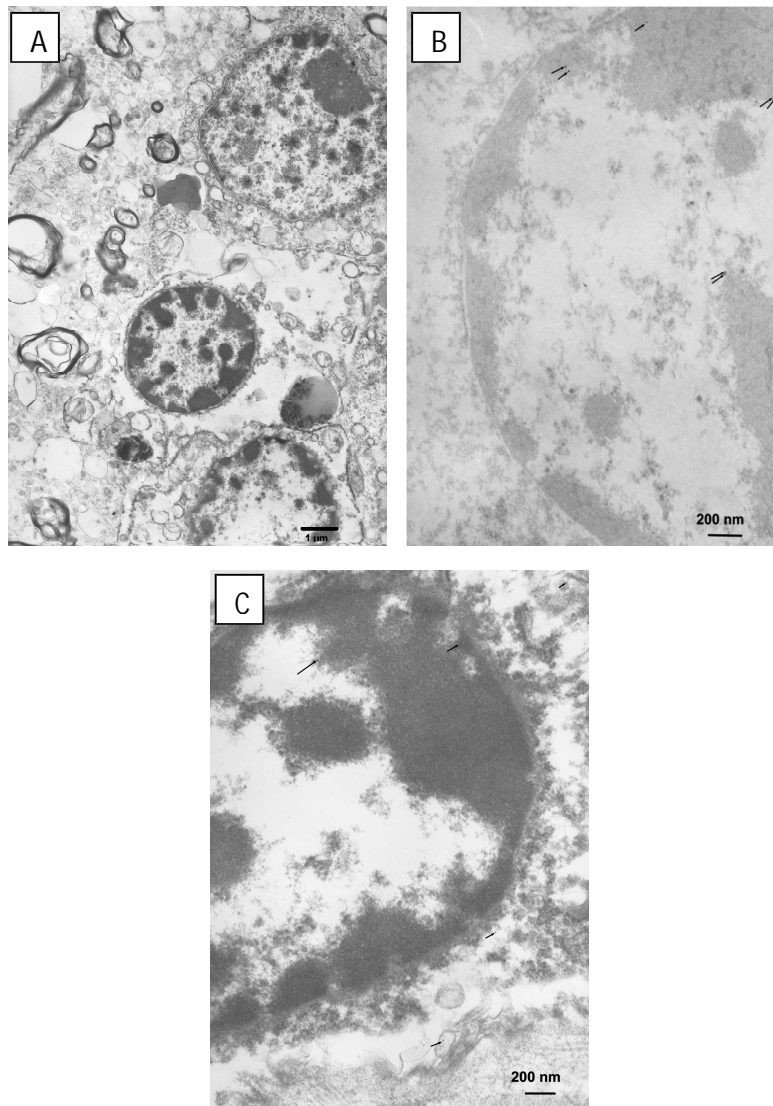

Supplementary Figure 2. TEM: (A) Electron microscope photomicrograph showing nuclei of the astrocyte, oligodendrocyte and neuron, original magnification  $\times 50000$ , (B) Immunogold staining, oligodendrocyte, original magnification  $\times 20000$ , (C) Immunogold staining, oligodendrocyte, original magnification  $\times 20000$ . Figures (B) and (C): arrows show small gold particles (practically non-visible in this magnification) in the oligodendrocytes nuclei.
